# Supplementary material for: Lacticaseibacillus paracasei 207-27 alters the microbiota–gut–brain axis to improve wearable device-measured sleep duration in healthy adults: a randomized, double-blind, placebo-controlled trial
Source: Royal Society of Chemistry journal article supplement (doi:10.1039/d4fo01684j), 2024-01-01
Supplement: d4fo01684j4.pdf [file d4fo01684j4.pdf]

**Supplementary Table 1. The complete blood count and serum biochemistry before and after intervention**

|                        | Placebo      |              | Low dose group |              | High dose group |                |
|------------------------|--------------|--------------|----------------|--------------|-----------------|----------------|
|                        | Baseline     | 4 weeks      | Baseline       | 4 weeks      | Baseline        | 4 weeks        |
| <b>Hematology</b>      |              |              |                |              |                 |                |
| WBC ( $10^9/L$ )       | 5.65±1.21    | 5.62±1.13    | 6.2±1.44       | 6.01±1.37    | 5.80±1.24       | 5.72±1.17      |
| GR (%)                 | 55.24±7.67   | 55.9±5.84    | 54.66±5.82     | 55.05±6.64   | 53.4±14.15      | 55.5±7.72      |
| LY (%)                 | 37.34±7.63   | 37.17±5.79   | 37.95±5.99     | 37.6±6.65    | 38.15±10.94     | 37.52±7.59     |
| MID (%)                | 7.46±1.11    | 6.93±1.14    | 7.39±0.99      | 7.36±0.82    | 7.26±1.27       | 6.98±0.99      |
| RBC ( $10^{12}/L$ )    | 4.73±0.57    | 4.67±0.49    | 4.63±0.47      | 4.63±0.48    | 4.57±0.49       | 6.06±1.47      |
| HGB(g/dL)              | 138.12±14.42 | 137.38±12.6  | 137.42±11.42   | 138.21±14.07 | 133.46±18.17    | 134.18±19.12   |
| HCT (%)                | 40.96±4.49   | 40.43±3.74   | 40.7±3.5       | 40.57±3.88   | 39.77±5.26      | 6.06±1.47      |
| MCV (pl)               | 86.90±3.49   | 86.79±3.48   | 87.77±3.46     | 87.24±3.66*  | 86.75±5.95      | 86.29±5.85     |
| MCH (pg)               | 29.44±1.61   | 29.5±1.51    | 29.74±1.39     | 29.79±1.38   | 29.22±2.27      | 29.24±2.28     |
| MCHC (%)               | 337.76±7.95  | 340.26±7*    | 338.67±7.19    | 340.97±5.64* | 336.51±6.84     | 338.43±6.53    |
| CV (fL)                | 14.26±0.9    | 14.14±0.89   | 14.29±0.73     | 14.14±0.7    | 14.4±0.94       | 14.29±0.85     |
| SD (fL)                | 46.63±2.41   | 46.02±2.43   | 47.39±2.87     | 46.6±2.92*   | 46.83±3.47      | 46.21±3.15     |
| PLT ( $10^9/L$ )       | 239.74±41.61 | 241.76±45.28 | 238.67±53.87   | 230±55.24*   | 257.49±55.6     | 256.3±59.74    |
| PCT (%)                | 0.21±0.03    | 0.21±0.04    | 0.22±0.05      | 0.21±0.04**  | 0.23±0.04       | 0.22±0.05      |
| MPV (fL)               | 9.12±0.95    | 9.03±0.89    | 9.52±0.9       | 9.82±1.17    | 9.22±0.96       | 9.05±1.03      |
| PDW (%)                | 11.56±0.96   | 11.73±1      | 12.18±1.62     | 12.11±1.15   | 11.71±1.14      | 11.45±1.12     |
| <b>Blood chemistry</b> |              |              |                |              |                 |                |
| TBIL (mg/dL)           | 16.06±6.44   | 16.94±7.71   | 13.49±5.8      | 13.94±5.65   | 13.07±3.31      | 14.67±4.03*    |
| IBIL (mg/dL)           | 5.86±2.8     | 6.43±3.63    | 4.6±1.98       | 4.92±2.02    | 4.37±1.5        | 5.06±1.83      |
| DB (mg/dL)             | 10.2±3.9     | 10.51±4.38   | 8.89±4.12      | 9.02±3.94    | 8.7±2.06        | 9.61±2.5       |
| TP(g/dL)               | 70.82±2.62   | 69.14±2.32*  | 70.62±3.31     | 69.96±3.27   | 70.4±3.46       | 69.48±3.01     |
| ALB(g/dL)              | 46.66±1.64   | 44.02±1.65*  | 45.71±2.04     | 43.99±2.48** | 46.25±2.91      | 44.16±2.28***  |
| GLOB(g/dL)             | 24.16±2.37   | 25.12±2.49** | 24.92±1.94     | 25.97±1.84** | 24.15±2.29      | 25.32±2.74***  |
| A/G                    | 1.95±0.2     | 1.77±0.22*** | 1.84±0.14      | 1.7±0.15***  | 1.94±0.23       | 1.76±0.24***   |
| ALT(IU/L)              | 13.74±10.52  | 13.68±5.63   | 12.58±5.96     | 13.55±7.65   | 13.59±6.97      | 15.03±7.78     |
| AST(IU/L)              | 18.76±4.72   | 18.62±3.38   | 17.67±4.38     | 17.12±4.12   | 20.16±8.51      | 18.73±5.64     |
| ALT/AST                | 1.69±0.6     | 1.56±0.58    | 1.57±0.5       | 1.48±0.52    | 1.67±0.57       | 1.42±0.52      |
| ALP(IU/L)              | 52.85±11.83  | 54.56±13.71  | 50.64±13.55    | 51.97±14.31  | 49.65±10.76     | 50.7±9.61      |
| GGT(IU/L)              | 14.79±3.80   | 14.85±3.77   | 16.73±6.23     | 16.33±7.06   | 16.78±8.79      | 17.59±8.94     |
| BUN (mg/dL)            | 4.52±0.87    | 3.90±0.76    | 4.56±1.28      | 4.01±1.1**   | 4.61±1.26       | 4.02±1.03***   |
| Cr(mg/dL)              | 62.98±8.89   | 46.69±9.25   | 62.85±9.98     | 42.91±8.19** | 63.29±12.74     | 45.67±10.07*** |
| UA (mg/dL)             | 310.17±77.47 | 333.58±83.15 | 327.35±73.97   | 322.85±66.3  | 315.12±94.59    | 321.82±84.47   |

Data expressed as mean±standard deviations. The levels of complete blood count and serum biochemistry were analyzed among three groups at baseline and the end of intervention using one-way analysis of variance or the Kruskal–Wallis H-test, and the Benjamin–Krieger–Yekutieli method was used to adjust *P* values for pairwise comparisons. Self-comparisons within the groups before and after the intervention were carried out. \* represent *P* < 0.05, \*\* represent *P* < 0.01, \*\*\* represent *P* < 0.001.
