# Supplementary material for: Lacticaseibacillus paracasei 207-27 alters the microbiota–gut–brain axis to improve wearable device-measured sleep duration in healthy adults: a randomized, double-blind, placebo-controlled trial
Source: Royal Society of Chemistry journal article supplement (doi:10.1039/d4fo01684j), 2024-01-01
Supplement: d4fo01684j5.pdf [file d4fo01684j5.pdf]

**Supplementary Table 2. The blood glucose and blood lipid profiles levels before and after intervention**

|                                      | Placebo   |           | Low dose group |              | High dose group |           |
|--------------------------------------|-----------|-----------|----------------|--------------|-----------------|-----------|
|                                      | Baseline  | 4 Weeks   | Baseline       | 4 Weeks      | Baseline        | 4 Weeks   |
| <b>Fasting blood glucose(mmol/L)</b> | 4.52±0.33 | 4.9±0.29  | 4.56±0.28      | 4.84±0.32*** | 4.64±0.37       | 4.95±0.4  |
| <b>Total cholesterol (mg/dl)</b>     | 3.83±0.84 | 4.09±0.76 | 4.06±0.75      | 4.32±0.72*** | 4.12±0.90       | 4.28±0.86 |
| <b>Triglyceride (mg/dl)</b>          | 0.75±0.37 | 0.85±0.44 | 1.03±0.79      | 1.1±0.73     | 0.94±0.52       | 1.12±0.8  |
| <b>HDL-C (mg/dl)</b>                 | 1.63±0.4  | 1.66±0.35 | 1.58±0.3       | 1.62±0.3     | 1.51±0.27       | 1.49±0.26 |
| <b>LDL-C (mg/dl)</b>                 | 1.86±0.54 | 2.05±0.58 | 2.01±0.5       | 2.2±0.51     | 2.18±0.81       | 2.27±0.8  |

Data expressed as mean ± standard deviations. The levels of blood glucose and blood lipid profiles were analyzed among three groups at baseline and the end of intervention using one-way analysis of variance or the Kruskal–Wallis H-test, and the Benjamin–Krieger–Yekutieli method was used to adjust *P* values for pairwise comparisons. Self-comparisons within the groups before and after the intervention were carried out and \*\*\* represent *P* < 0.001.
