# Supplementary material for: Lacticaseibacillus paracasei 207-27 alters the microbiota–gut–brain axis to improve wearable device-measured sleep duration in healthy adults: a randomized, double-blind, placebo-controlled trial
Source: Royal Society of Chemistry journal article supplement (doi:10.1039/d4fo01684j), 2024-01-01
Supplement: d4fo01684j7.pdf [file d4fo01684j7.pdf]

**Supplementary Table 6. The inflammatory factors before and after intervention**

|                                       | Placebo         |                 | Low dose group   |                 | High dose group |                 |
|---------------------------------------|-----------------|-----------------|------------------|-----------------|-----------------|-----------------|
|                                       | Baseline        | 4 Weeks         | Baseline         | 4 Weeks         | Baseline        | 4 Weeks         |
| <b>TNF-<math>\alpha</math>(pg/ml)</b> | 0.78 $\pm$ 0.70 | 1.4 $\pm$ 0.97  | 0.78 $\pm$ 0.61  | 0.98 $\pm$ 0.74 | 0.80 $\pm$ 0.64 | 1.01 $\pm$ 0.73 |
| <b>IL-6(pg/ml)</b>                    | 0.26 $\pm$ 0.27 | 0.34 $\pm$ 0.25 | 0.33 $\pm$ 0.484 | 0.56 $\pm$ 0.41 | 0.30 $\pm$ 0.35 | 0.54 $\pm$ 0.41 |
| <b>IL-1<math>\beta</math>(pg/ml)</b>  | 0.67 $\pm$ 0.63 | 0.80 $\pm$ 0.71 | 1.18 $\pm$ 0.63  | 1.27 $\pm$ 0.73 | 0.95 $\pm$ 0.65 | 1.08 $\pm$ 0.72 |

Data expressed as mean $\pm$ standard deviations. The levels of inflammatory factors were analyzed among three groups at baseline and the end of intervention using one-way analysis of variance or the Kruskal–Wallis H-test, and the Benjamin–Krieger–Yekutieli method was used to adjust *P* values for pairwise comparisons.
