# Supplementary material for: Lacticaseibacillus paracasei 207-27 alters the microbiota–gut–brain axis to improve wearable device-measured sleep duration in healthy adults: a randomized, double-blind, placebo-controlled trial
Source: Royal Society of Chemistry journal article supplement (doi:10.1039/d4fo01684j), 2024-01-01
Supplement: d4fo01684j8.pdf [file d4fo01684j8.pdf]

**Supplementary Table 4.** Mean relative abundance of top 4 different taxa at phylum level

|                         | Placebo       |                                  | Low dose group      |               | High dose group |               |
|-------------------------|---------------|----------------------------------|---------------------|---------------|-----------------|---------------|
|                         | Baseline      | 4 weeks                          | Baseline            | 4 weeks       | Baseline        | 4 weeks       |
| <b>Firmicutes</b>       | 0.6482±0.1459 | 0.6596±0.1481                    | 0.6580±0.1290       | 0.6289±0.1325 | 0.6434±0.1678   | 0.6553±0.1896 |
| <b>Actinobacteriota</b> | 0.1700±0.1046 | 0.1167±0.1114                    | 0.1280±0.1107       | 0.1010±0.1203 | 0.1389±0.0857   | 0.1103±0.1280 |
| <b>Bacteroidota</b>     | 0.1077±0.0252 | 0.1325±0.0246 <sup>a</sup>       | 0.1062±0.0957       | 0.2062±0.1298 | 0.1281±0.0717   | 0.1655±0.1086 |
| <b>Proteobacteria</b>   | 0.0790±0.0727 | 0.0636±0.0567                    | 0.0832±0.0889       | 0.0454±0.0740 | 0.064±0.0597    | 0.0478±0.1107 |
| <b>F/B</b>              | 7.6310±8.7460 | 22.9150±35.594<br>0 <sup>a</sup> | 11.3096±15.072<br>4 | 6.1567±8.5521 | 7.4971±5.4348   | 8.1785±9.6824 |

Data expressed as mean±standard deviations. The mean relative abundance of different taxa at phylum level were analyzed among three groups at baseline and the end of intervention using one-way analysis of variance or the Kruskal–Wallis H-test, and the Benjamin–Krieger–Yekutieli method was used to adjust *P* values for pairwise comparisons. <sup>a</sup> Significant difference between the low-dose and the placebo groups; <sup>b</sup> Significant difference between the high-dose and the placebo groups.
