# Supplementary material for: Lacticaseibacillus paracasei 207-27 alters the microbiota–gut–brain axis to improve wearable device-measured sleep duration in healthy adults: a randomized, double-blind, placebo-controlled trial
Source: Royal Society of Chemistry journal article supplement (doi:10.1039/d4fo01684j), 2024-01-01
Supplement: d4fo01684j9.pdf [file d4fo01684j9.pdf]

|                             | Placebo       |                             | Low dose group |               | High dose group |               |
|-----------------------------|---------------|-----------------------------|----------------|---------------|-----------------|---------------|
|                             | Baseline      | 4 weeks                     | Baseline       | 4 weeks       | Baseline        | 4 weeks       |
| <b>Blautia</b>              | 0.0786±0.0317 | 0.0947±0.0149 <sup>a</sup>  | 0.0867±0.3230  | 0.0572±0.0214 | 0.0918±0.0394   | 0.0946±0.0328 |
| <b>Dialister</b>            | 0.0312±0.0765 | 0.0590±0.1202               | 0.0199±0.0011  | 0.0563±0.0076 | 0.0191±0.0017   | 0.0437±0.0025 |
| <b>Subdoligranulum</b>      | 0.0765±0.0717 | 0.0843±0.1086               | 0.0644±0.0649  | 0.0660±0.0035 | 0.0833±0.0252   | 0.0667±0.0246 |
| <b>Bifidobacterium</b>      | 0.1045±0.0654 | 0.0846±0.0668               | 0.0771±0.0299  | 0.0681±0.0295 | 0.0984±0.0674   | 0.0751±0.1016 |
| <b>Prevotella</b>           | 0.0420±0.0489 | 0.0534±0.0666               | 0.0354±0.0301  | 0.0496±0.0865 | 0.0375±0.0317   | 0.0379±0.0829 |
| <b>Megamonas</b>            | 0.0069±0.0670 | 0.0069±0.0015 <sup>b</sup>  | 0.0022±0.0092  | 0.0195±0.0643 | 0.0094±0.0362   | 0.0361±0.0936 |
| <b>Collinsella</b>          | 0.0508±0.0052 | 0.0228±0.0863               | 0.0420±0.0149  | 0.0277±0.0106 | 0.0303±0.0152   | 0.0301±0.0332 |
| <b>Bacteroides</b>          | 0.0396±0.0409 | 0.0555±0.0912 <sup>a</sup>  | 0.0563±0.0507  | 0.1111±0.0570 | 0.0684±0.0919   | 0.0958±0.0461 |
| <b>Escherichia-Shigella</b> | 0.0424±0.0708 | 0.0302±0.0920 <sup>ab</sup> | 0.0425±0.0793  | 0.0194±0.0914 | 0.0408±0.0958   | 0.0231±0.0902 |
| <b>Faecalibacterium</b>     | 0.0370±0.0685 | 0.0354±0.0523               | 0.0477±0.0805  | 0.0663±0.0666 | 0.0362±0.0086   | 0.0335±0.0709 |

**Supplementary Table 5.** Mean relative abundance of top 10 different taxa at genus level

Data expressed as mean±standard deviations. The mean relative abundance of different taxa at genus level were analyzed among three groups at baseline and the end of intervention using one-way analysis of variance or the Kruskal–Wallis H-test, and the Benjamin–Krieger–Yekutieli method was used to adjust *P* values for pairwise comparisons. <sup>a</sup> Significant difference between the low-dose and the placebo groups; <sup>b</sup> Significant difference between the high-dose and the placebo groups.
