# Supplementary figures and images for: Lacticaseibacillus paracasei 207-27 alters the microbiota–gut–brain axis to improve wearable device-measured sleep duration in healthy adults: a randomized, double-blind, placebo-controlled trial
Source: Royal Society of Chemistry journal article supplement (doi:10.1039/d4fo01684j), 2024-01-01

**A**

**Sleep duration - 0 day**

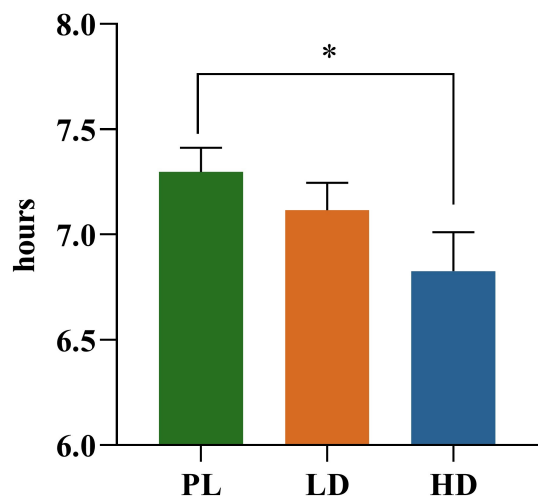

**B**

**Sleep duration - 28 day**

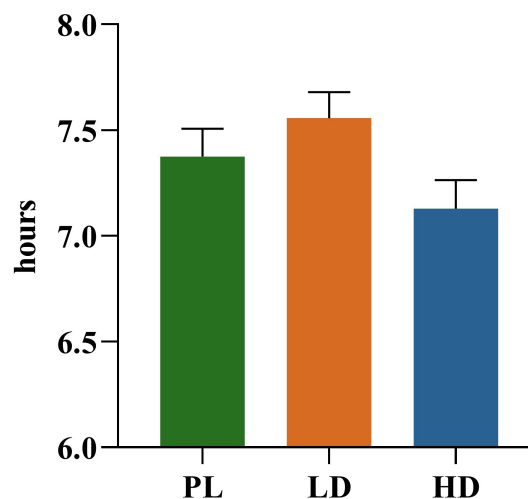

**C**

**Awakening times - 0 day**

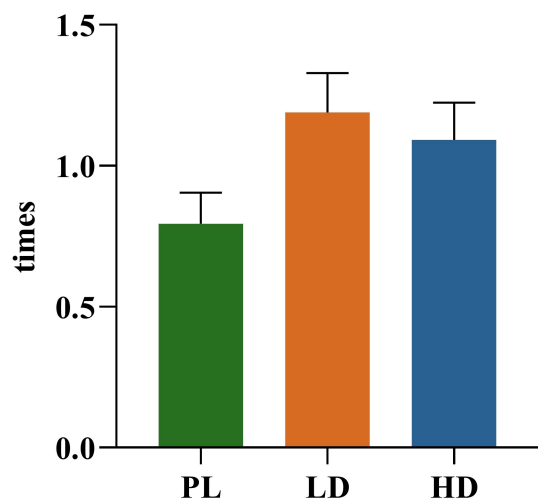

**D**

**Awakening times - 28 day**

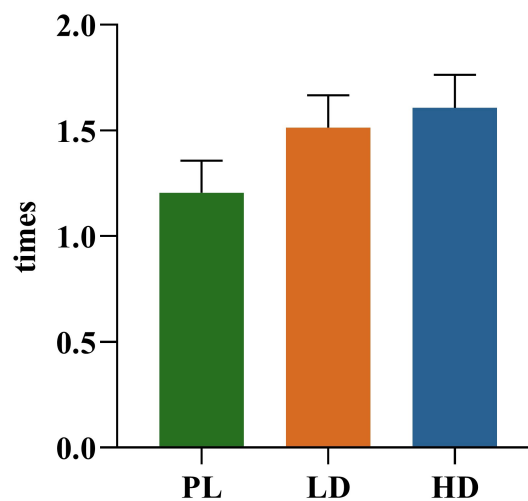

Supplement: d4fo01684j1.pdf [file d4fo01684j1.pdf]

**0d**

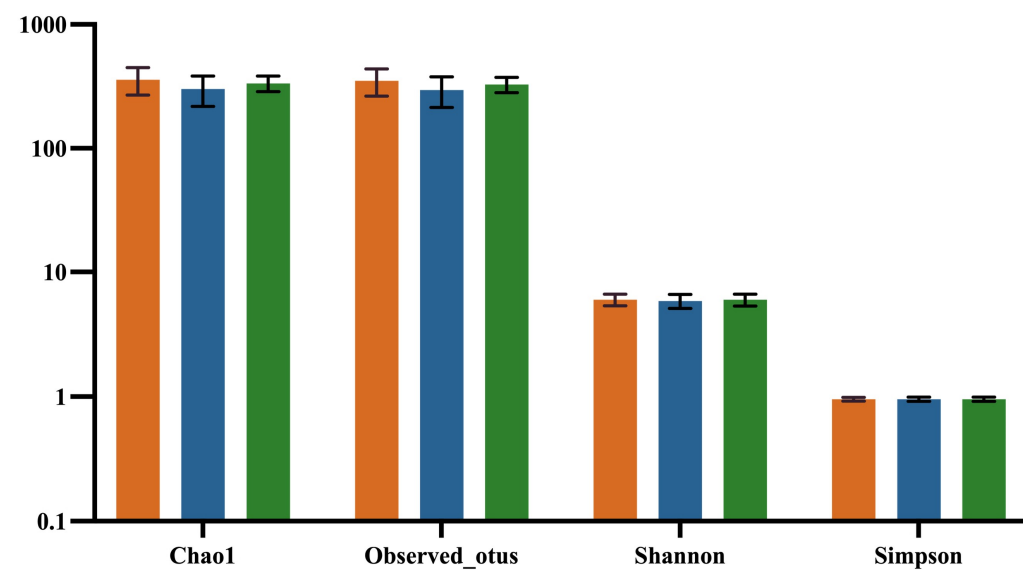

**28d**

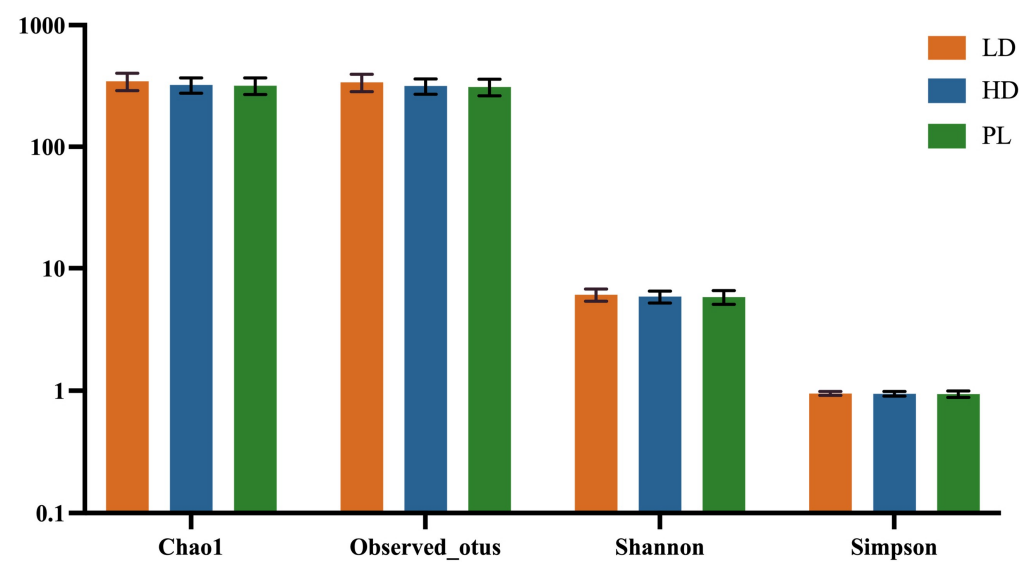

Supplement: d4fo01684j2.pdf [file d4fo01684j2.pdf]

# PCOA 28d

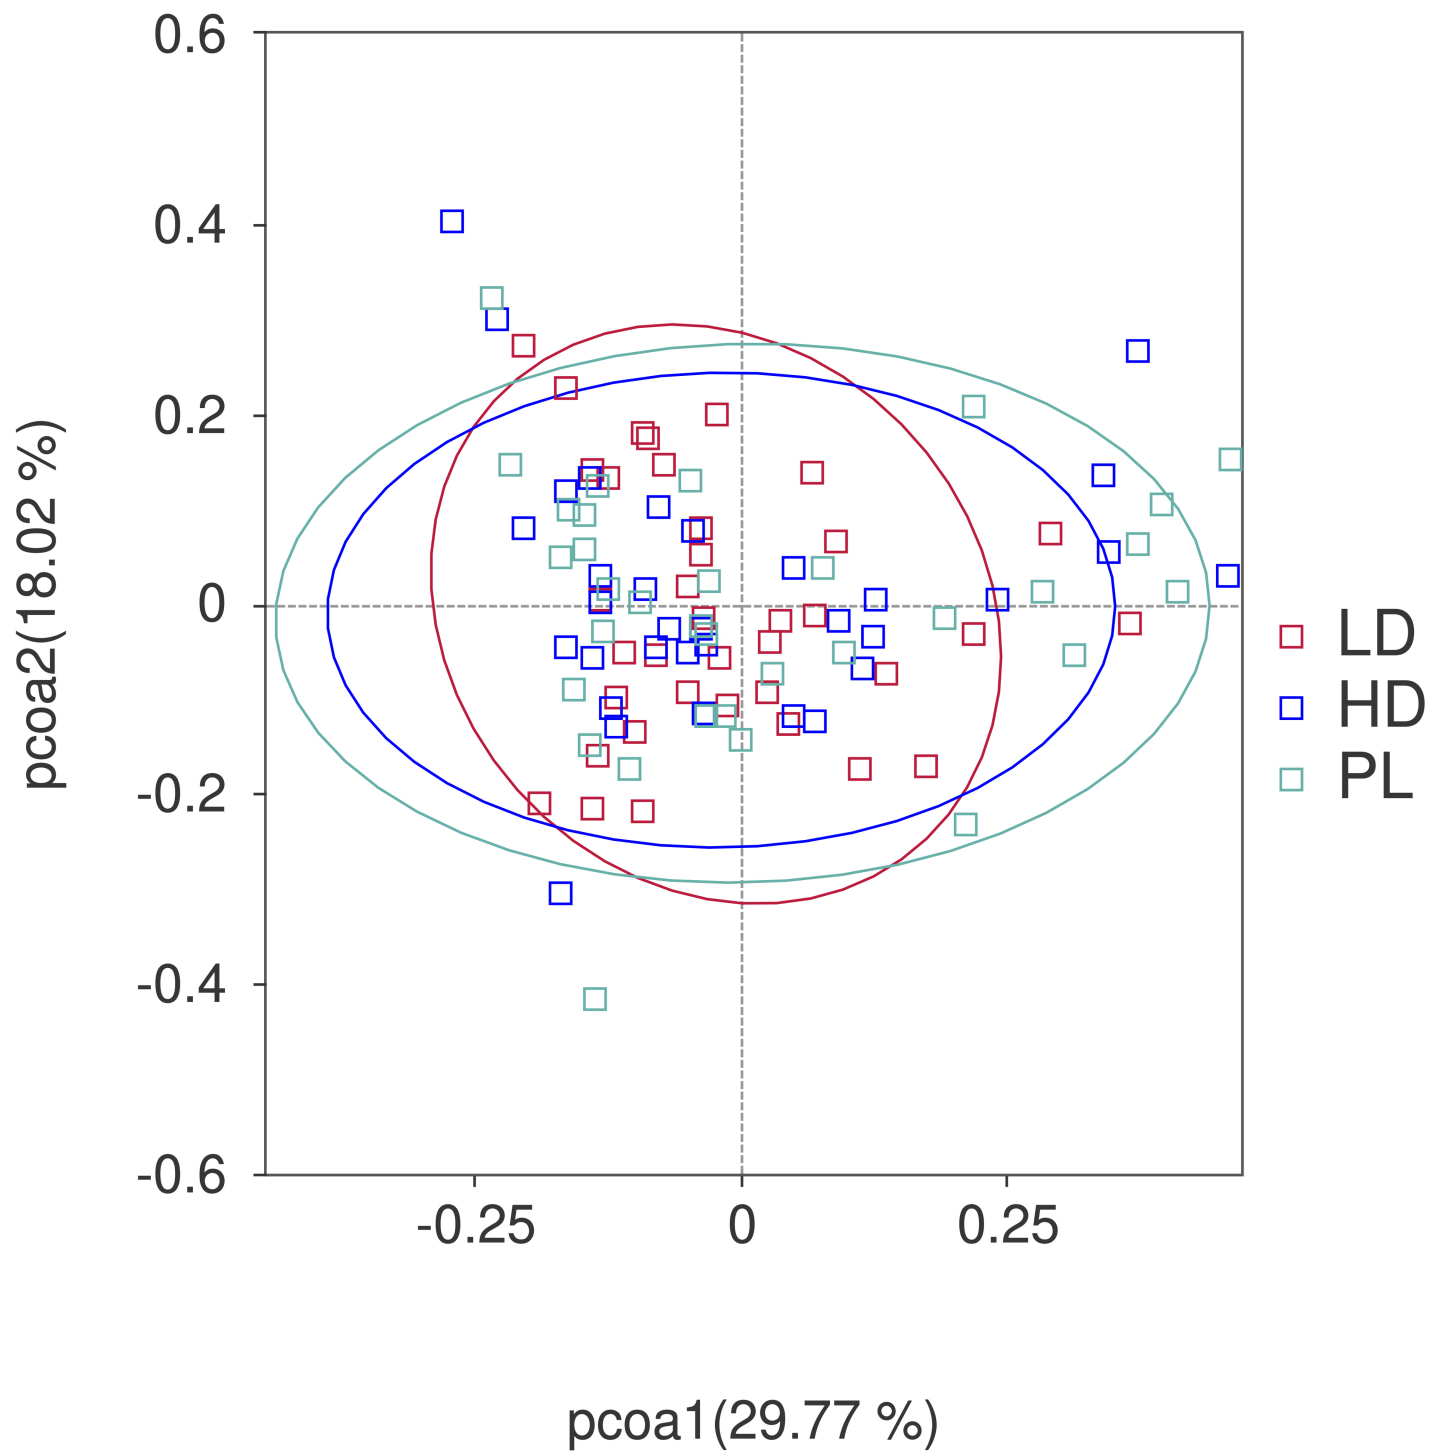

Supplement: d4fo01684j3.pdf [file d4fo01684j3.pdf]
